# Supplementary material
Source: Springer Nature journal article supplement (https://www.springermedizin.de/resource/supplementary/12888_2010_691_MOESM1_ESM.pdf/9478172)
Supplement: MOESM1 [file 9478172]

## Location of participating practices in ProCEED

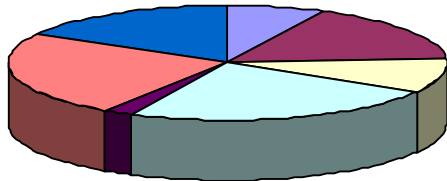

- Greater London (3)
- Midlands (7)
- Northern Ireland (4)
- North of England (10)
- Scotland (1)
- South East England (10)
- South West England (7)
